# Supplementary material
Source: publisher figshare collection journal article supplement (https://acs.figshare.com/ndownloader/files/6523308)
Supplement: Supplementary file 1 [file 6523308]

  
data_2a 
  
_audit_creation_method            SHELXL-97 
_chemical_name_systematic 
; 
 ? 
; 
_chemical_name_common             ? 
_chemical_melting_point           ? 
_chemical_formula_moiety          ? 
_chemical_formula_sum 
 'C14 H13 N O4' 
_chemical_formula_weight          259.25 
  
loop_ 
 _atom_type_symbol 
 _atom_type_description 
 _atom_type_scat_dispersion_real 
 _atom_type_scat_dispersion_imag 
 _atom_type_scat_source 
 'C'  'C'   0.0033   0.0016 
 'International Tables Vol C Tables 4.2.6.8 and 6.1.1.4' 
 'H'  'H'   0.0000   0.0000 
 'International Tables Vol C Tables 4.2.6.8 and 6.1.1.4' 
 'N'  'N'   0.0061   0.0033 
 'International Tables Vol C Tables 4.2.6.8 and 6.1.1.4' 
 'O'  'O'   0.0106   0.0060 
 'International Tables Vol C Tables 4.2.6.8 and 6.1.1.4' 
  
_symmetry_cell_setting            Monoclinic 
_symmetry_space_group_name_H-M    P2(1)/c 
  
loop_ 
 _symmetry_equiv_pos_as_xyz 
 'x, y, z' 
 '-x, y+1/2, -z+1/2' 
 '-x, -y, -z' 
 'x, -y-1/2, z-1/2' 
  
_cell_length_a                    9.625(3) 
_cell_length_b                    16.950(5) 
_cell_length_c                    8.295(3) 
_cell_angle_alpha                 90.00 
_cell_angle_beta                  114.355(6) 
_cell_angle_gamma                 90.00 
_cell_volume                      1232.8(7) 
_cell_formula_units_Z             4 
_cell_measurement_temperature     113(2) 
_cell_measurement_reflns_used           2493 
_cell_measurement_theta_min             3.3 
_cell_measurement_theta_max             27.5 
  
_exptl_crystal_description        Prism 
_exptl_crystal_colour             Colorless 
_exptl_crystal_size_max           0.20 
_exptl_crystal_size_mid           0.18 
_exptl_crystal_size_min           0.12 
_exptl_crystal_density_meas       ? 
_exptl_crystal_density_diffrn     1.397 
_exptl_crystal_density_method     'not measured' 
_exptl_crystal_F_000              544 
_exptl_absorpt_coefficient_mu     0.103 
_exptl_absorpt_correction_type    MULTI-SCAN 
_exptl_absorpt_correction_T_min   0.9796 
_exptl_absorpt_correction_T_max   0.9877 
_exptl_absorpt_process_details    'REQAB (Rigaku, 1998)' 
  
_exptl_special_details 
; 
 ? 
; 
  
_diffrn_ambient_temperature       113(2) 
_diffrn_radiation_wavelength      0.71073 
_diffrn_radiation_type            MoK\a 
_diffrn_radiation_source          'rotating anode' 
_diffrn_radiation_monochromator   multilayer 
_diffrn_measurement_device_type   'Rigaku XtaLAB P200' 
_diffrn_measurement_method        '\w and \f scans' 
_diffrn_detector_area_resol_mean  5.814 
_diffrn_standards_number          0 
_diffrn_standards_interval_count  0 
_diffrn_standards_interval_time   0 
_diffrn_standards_decay_%         0 
_diffrn_reflns_number             10260 
_diffrn_reflns_av_R_equivalents   0.0523 
_diffrn_reflns_av_sigmaI/netI     0.0363 
_diffrn_reflns_limit_h_min        -9 
_diffrn_reflns_limit_h_max        11 
_diffrn_reflns_limit_k_min        -20 
_diffrn_reflns_limit_k_max        20 
_diffrn_reflns_limit_l_min        -9 
_diffrn_reflns_limit_l_max        9 
_diffrn_reflns_theta_min          3.34 
_diffrn_reflns_theta_max          25.02 
_reflns_number_total              2160 
_reflns_number_gt                 1729 
_reflns_threshold_expression      >2sigma(I) 
  
_computing_data_collection   'CrystalClear-SM Expert 2.1 b42 (Rigaku, 2015)' 
_computing_cell_refinement    'CrystalClear-SM Expert 2.1 b42' 
_computing_data_reduction     'CrystalClear-SM Expert 2.1 b42' 
_computing_structure_solution     'SHELXS-97 (Sheldrick, 1990)' 
_computing_structure_refinement   'SHELXL-97 (Sheldrick, 1997)' 
_computing_molecular_graphics     'CrystalStructure 4.1' 
_computing_publication_material   'CrystalStructure 4.1 (Rigaku, 2014)' 
  
_refine_special_details 
; 
 Refinement of F^2^ against ALL reflections.  The weighted R-factor wR and 
 goodness of fit S are based on F^2^, conventional R-factors R are based 
 on F, with F set to zero for negative F^2^. The threshold expression of 
 F^2^ > 2sigma(F^2^) is used only for calculating R-factors(gt) etc. and is 
 not relevant to the choice of reflections for refinement.  R-factors based 
 on F^2^ are statistically about twice as large as those based on F, and R- 
 factors based on ALL data will be even larger. 
; 
  
_refine_ls_structure_factor_coef  Fsqd 
_refine_ls_matrix_type            full 
_refine_ls_weighting_scheme       calc 
_refine_ls_weighting_details 
 'calc w=1/[\s^2^(Fo^2^)+(0.1600P)^2^+2.8840P] where P=(Fo^2^+2Fc^2^)/3' 
_atom_sites_solution_primary      direct 
_atom_sites_solution_secondary    difmap 
_atom_sites_solution_hydrogens    geom 
_refine_ls_hydrogen_treatment     CONSTR 
_refine_ls_extinction_method      none 
_refine_ls_extinction_coef        ? 
_refine_ls_number_reflns          2160 
_refine_ls_number_parameters      174 
_refine_ls_number_restraints      0 
_refine_ls_R_factor_all           0.0757 
_refine_ls_R_factor_gt            0.0631 
_refine_ls_wR_factor_ref          0.2627 
_refine_ls_wR_factor_gt           0.2530 
_refine_ls_goodness_of_fit_ref    1.050 
_refine_ls_restrained_S_all       1.050 
_refine_ls_shift/su_max           0.004 
_refine_ls_shift/su_mean          0.000 
  
loop_ 
 _atom_site_label 
 _atom_site_type_symbol 
 _atom_site_fract_x 
 _atom_site_fract_y 
 _atom_site_fract_z 
 _atom_site_U_iso_or_equiv 
 _atom_site_adp_type 
 _atom_site_occupancy 
 _atom_site_symmetry_multiplicity 
 _atom_site_calc_flag 
 _atom_site_refinement_flags 
 _atom_site_disorder_assembly 
 _atom_site_disorder_group 
O4 O 1.0293(3) 0.13736(16) 0.1972(4) 0.0260(7) Uani 1 1 d . . . 
O3 O 0.9266(3) 0.06791(16) 0.3440(4) 0.0261(7) Uani 1 1 d . . . 
O1 O 0.9006(4) 0.12802(19) 0.6697(4) 0.0396(9) Uani 1 1 d . . . 
O2 O 0.5690(4) 0.15306(18) 0.2685(4) 0.0357(8) Uani 1 1 d . . . 
N1 N 0.7475(4) 0.01799(19) 0.6168(4) 0.0242(8) Uani 1 1 d . . . 
C1 C 0.6813(4) -0.0365(2) 0.4768(5) 0.0230(9) Uani 1 1 d . . . 
C2 C 0.6021(5) -0.1049(2) 0.4751(5) 0.0266(9) Uani 1 1 d . . . 
H2 H 0.5821 -0.1200 0.5738 0.032 Uiso 1 1 calc R . . 
C3 C 0.5530(5) -0.1504(2) 0.3217(6) 0.0308(10) Uani 1 1 d . . . 
H3 H 0.4987 -0.1979 0.3161 0.037 Uiso 1 1 calc R . . 
C4 C 0.5812(5) -0.1284(3) 0.1771(6) 0.0303(10) Uani 1 1 d . . . 
H4 H 0.5481 -0.1612 0.0753 0.036 Uiso 1 1 calc R . . 
C5 C 0.6582(5) -0.0582(2) 0.1805(5) 0.0285(9) Uani 1 1 d . . . 
H5 H 0.6752 -0.0419 0.0805 0.034 Uiso 1 1 calc R . . 
C6 C 0.7091(5) -0.0130(2) 0.3323(5) 0.0240(9) Uani 1 1 d . . . 
C7 C 0.7900(5) 0.0647(2) 0.3762(5) 0.0244(9) Uani 1 1 d . . . 
C8 C 0.8253(5) 0.0751(2) 0.5744(5) 0.0271(9) Uani 1 1 d . . . 
C9 C 0.7450(5) 0.0115(2) 0.7899(5) 0.0278(10) Uani 1 1 d . . . 
H9A H 0.8327 -0.0197 0.8680 0.042 Uiso 1 1 calc R . . 
H9B H 0.6505 -0.0146 0.7786 0.042 Uiso 1 1 calc R . . 
H9C H 0.7500 0.0643 0.8401 0.042 Uiso 1 1 calc R . . 
C10 C 0.6934(5) 0.1366(2) 0.2714(5) 0.0264(9) Uani 1 1 d . . . 
C11 C 0.7817(5) 0.1729(2) 0.1913(5) 0.0272(9) Uani 1 1 d . . . 
H11 H 0.7547 0.2186 0.1186 0.033 Uiso 1 1 calc R . . 
C12 C 0.9116(5) 0.1305(2) 0.2374(5) 0.0227(9) Uani 1 1 d . . . 
C13 C 1.0217(5) 0.2041(2) 0.0794(5) 0.0266(9) Uani 1 1 d . . . 
H13A H 1.0152 0.2546 0.1358 0.032 Uiso 1 1 calc R . . 
H13B H 0.9305 0.1992 -0.0338 0.032 Uiso 1 1 calc R . . 
C14 C 1.1635(5) 0.2022(3) 0.0468(6) 0.0353(11) Uani 1 1 d . . . 
H14A H 1.2531 0.2028 0.1603 0.053 Uiso 1 1 calc R . . 
H14B H 1.1658 0.2484 -0.0230 0.053 Uiso 1 1 calc R . . 
H14C H 1.1644 0.1540 -0.0182 0.053 Uiso 1 1 calc R . . 
  
loop_ 
 _atom_site_aniso_label 
 _atom_site_aniso_U_11 
 _atom_site_aniso_U_22 
 _atom_site_aniso_U_33 
 _atom_site_aniso_U_23 
 _atom_site_aniso_U_13 
 _atom_site_aniso_U_12 
O4 0.0297(16) 0.0235(15) 0.0276(15) 0.0047(11) 0.0146(12) 0.0008(11) 
O3 0.0292(15) 0.0240(15) 0.0280(15) 0.0056(11) 0.0145(12) 0.0008(11) 
O1 0.057(2) 0.0305(17) 0.0317(17) -0.0059(13) 0.0186(16) -0.0133(15) 
O2 0.0398(18) 0.0346(17) 0.0429(18) 0.0114(14) 0.0274(15) 0.0102(14) 
N1 0.0321(19) 0.0225(17) 0.0213(16) 0.0012(13) 0.0142(14) 0.0014(14) 
C1 0.025(2) 0.0213(19) 0.0223(19) 0.0016(15) 0.0098(16) 0.0039(15) 
C2 0.027(2) 0.025(2) 0.030(2) 0.0056(16) 0.0139(17) 0.0016(16) 
C3 0.029(2) 0.024(2) 0.036(2) 0.0004(17) 0.0101(18) -0.0013(17) 
C4 0.030(2) 0.028(2) 0.030(2) -0.0068(17) 0.0101(18) -0.0013(17) 
C5 0.031(2) 0.032(2) 0.024(2) 0.0003(16) 0.0125(17) 0.0032(17) 
C6 0.027(2) 0.023(2) 0.0234(19) 0.0027(15) 0.0111(16) 0.0033(15) 
C7 0.027(2) 0.024(2) 0.026(2) 0.0014(15) 0.0149(17) 0.0021(16) 
C8 0.035(2) 0.021(2) 0.026(2) 0.0026(16) 0.0134(17) 0.0018(16) 
C9 0.039(2) 0.026(2) 0.022(2) 0.0024(15) 0.0159(18) 0.0027(17) 
C10 0.035(2) 0.022(2) 0.025(2) 0.0032(15) 0.0158(18) 0.0062(17) 
C11 0.034(2) 0.025(2) 0.0255(19) 0.0038(16) 0.0156(17) 0.0022(17) 
C12 0.031(2) 0.0192(19) 0.0195(18) -0.0006(14) 0.0121(16) -0.0020(15) 
C13 0.033(2) 0.022(2) 0.026(2) 0.0039(15) 0.0135(17) 0.0002(16) 
C14 0.035(2) 0.036(2) 0.037(2) 0.0098(19) 0.018(2) -0.0033(19) 
  
_geom_special_details 
; 
 All esds (except the esd in the dihedral angle between two l.s. planes) 
 are estimated using the full covariance matrix.  The cell esds are taken 
 into account individually in the estimation of esds in distances, angles 
 and torsion angles; correlations between esds in cell parameters are only 
 used when they are defined by crystal symmetry.  An approximate (isotropic) 
 treatment of cell esds is used for estimating esds involving l.s. planes. 
; 
  
loop_ 
 _geom_bond_atom_site_label_1 
 _geom_bond_atom_site_label_2 
 _geom_bond_distance 
 _geom_bond_site_symmetry_2 
 _geom_bond_publ_flag 
O4 C12 1.310(5) . ? 
O4 C13 1.477(5) . ? 
O3 C12 1.350(5) . ? 
O3 C7 1.447(5) . ? 
O1 C8 1.218(5) . ? 
O2 C10 1.221(5) . ? 
N1 C8 1.356(5) . ? 
N1 C1 1.413(5) . ? 
N1 C9 1.450(5) . ? 
C1 C2 1.385(6) . ? 
C1 C6 1.390(5) . ? 
C2 C3 1.394(6) . ? 
C2 H2 0.9500 . ? 
C3 C4 1.386(6) . ? 
C3 H3 0.9500 . ? 
C4 C5 1.396(6) . ? 
C4 H4 0.9500 . ? 
C5 C6 1.379(6) . ? 
C5 H5 0.9500 . ? 
C6 C7 1.497(6) . ? 
C7 C8 1.545(5) . ? 
C7 C10 1.561(5) . ? 
C9 H9A 0.9800 . ? 
C9 H9B 0.9800 . ? 
C9 H9C 0.9800 . ? 
C10 C11 1.417(6) . ? 
C11 C12 1.354(6) . ? 
C11 H11 0.9500 . ? 
C13 C14 1.496(6) . ? 
C13 H13A 0.9900 . ? 
C13 H13B 0.9900 . ? 
C14 H14A 0.9800 . ? 
C14 H14B 0.9800 . ? 
C14 H14C 0.9800 . ? 
  
loop_ 
 _geom_angle_atom_site_label_1 
 _geom_angle_atom_site_label_2 
 _geom_angle_atom_site_label_3 
 _geom_angle 
 _geom_angle_site_symmetry_1 
 _geom_angle_site_symmetry_3 
 _geom_angle_publ_flag 
C12 O4 C13 115.1(3) . . ? 
C12 O3 C7 106.9(3) . . ? 
C8 N1 C1 111.3(3) . . ? 
C8 N1 C9 123.2(3) . . ? 
C1 N1 C9 125.3(3) . . ? 
C2 C1 C6 122.1(4) . . ? 
C2 C1 N1 128.0(3) . . ? 
C6 C1 N1 109.9(3) . . ? 
C1 C2 C3 116.8(4) . . ? 
C1 C2 H2 121.6 . . ? 
C3 C2 H2 121.6 . . ? 
C4 C3 C2 121.8(4) . . ? 
C4 C3 H3 119.1 . . ? 
C2 C3 H3 119.1 . . ? 
C3 C4 C5 120.3(4) . . ? 
C3 C4 H4 119.9 . . ? 
C5 C4 H4 119.9 . . ? 
C6 C5 C4 118.5(4) . . ? 
C6 C5 H5 120.7 . . ? 
C4 C5 H5 120.7 . . ? 
C5 C6 C1 120.4(4) . . ? 
C5 C6 C7 131.6(4) . . ? 
C1 C6 C7 107.9(3) . . ? 
O3 C7 C6 114.1(3) . . ? 
O3 C7 C8 112.0(3) . . ? 
C6 C7 C8 102.9(3) . . ? 
O3 C7 C10 104.2(3) . . ? 
C6 C7 C10 114.9(3) . . ? 
C8 C7 C10 108.8(3) . . ? 
O1 C8 N1 127.0(4) . . ? 
O1 C8 C7 125.9(4) . . ? 
N1 C8 C7 107.0(3) . . ? 
N1 C9 H9A 109.5 . . ? 
N1 C9 H9B 109.5 . . ? 
H9A C9 H9B 109.5 . . ? 
N1 C9 H9C 109.5 . . ? 
H9A C9 H9C 109.5 . . ? 
H9B C9 H9C 109.5 . . ? 
O2 C10 C11 131.7(4) . . ? 
O2 C10 C7 122.9(4) . . ? 
C11 C10 C7 105.4(3) . . ? 
C12 C11 C10 107.4(4) . . ? 
C12 C11 H11 126.3 . . ? 
C10 C11 H11 126.3 . . ? 
O4 C12 O3 111.5(3) . . ? 
O4 C12 C11 132.5(4) . . ? 
O3 C12 C11 116.0(3) . . ? 
O4 C13 C14 107.6(3) . . ? 
O4 C13 H13A 110.2 . . ? 
C14 C13 H13A 110.2 . . ? 
O4 C13 H13B 110.2 . . ? 
C14 C13 H13B 110.2 . . ? 
H13A C13 H13B 108.5 . . ? 
C13 C14 H14A 109.5 . . ? 
C13 C14 H14B 109.5 . . ? 
H14A C14 H14B 109.5 . . ? 
C13 C14 H14C 109.5 . . ? 
H14A C14 H14C 109.5 . . ? 
H14B C14 H14C 109.5 . . ? 
  
loop_ 
 _geom_torsion_atom_site_label_1 
 _geom_torsion_atom_site_label_2 
 _geom_torsion_atom_site_label_3 
 _geom_torsion_atom_site_label_4 
 _geom_torsion 
 _geom_torsion_site_symmetry_1 
 _geom_torsion_site_symmetry_2 
 _geom_torsion_site_symmetry_3 
 _geom_torsion_site_symmetry_4 
 _geom_torsion_publ_flag 
C8 N1 C1 C2 175.7(4) . . . . ? 
C9 N1 C1 C2 0.4(6) . . . . ? 
C8 N1 C1 C6 -3.0(5) . . . . ? 
C9 N1 C1 C6 -178.3(4) . . . . ? 
C6 C1 C2 C3 1.0(6) . . . . ? 
N1 C1 C2 C3 -177.5(4) . . . . ? 
C1 C2 C3 C4 -0.3(6) . . . . ? 
C2 C3 C4 C5 -1.2(7) . . . . ? 
C3 C4 C5 C6 2.0(6) . . . . ? 
C4 C5 C6 C1 -1.3(6) . . . . ? 
C4 C5 C6 C7 -178.1(4) . . . . ? 
C2 C1 C6 C5 -0.3(6) . . . . ? 
N1 C1 C6 C5 178.5(4) . . . . ? 
C2 C1 C6 C7 177.3(3) . . . . ? 
N1 C1 C6 C7 -4.0(4) . . . . ? 
C12 O3 C7 C6 125.7(3) . . . . ? 
C12 O3 C7 C8 -118.0(3) . . . . ? 
C12 O3 C7 C10 -0.5(4) . . . . ? 
C5 C6 C7 O3 -53.0(6) . . . . ? 
C1 C6 C7 O3 129.9(3) . . . . ? 
C5 C6 C7 C8 -174.5(4) . . . . ? 
C1 C6 C7 C8 8.4(4) . . . . ? 
C5 C6 C7 C10 67.4(6) . . . . ? 
C1 C6 C7 C10 -109.8(4) . . . . ? 
C1 N1 C8 O1 -176.1(4) . . . . ? 
C9 N1 C8 O1 -0.8(7) . . . . ? 
C1 N1 C8 C7 8.4(4) . . . . ? 
C9 N1 C8 C7 -176.2(3) . . . . ? 
O3 C7 C8 O1 51.3(5) . . . . ? 
C6 C7 C8 O1 174.3(4) . . . . ? 
C10 C7 C8 O1 -63.4(5) . . . . ? 
O3 C7 C8 N1 -133.1(3) . . . . ? 
C6 C7 C8 N1 -10.1(4) . . . . ? 
C10 C7 C8 N1 112.2(4) . . . . ? 
O3 C7 C10 O2 -179.6(4) . . . . ? 
C6 C7 C10 O2 54.7(5) . . . . ? 
C8 C7 C10 O2 -60.0(5) . . . . ? 
O3 C7 C10 C11 0.1(4) . . . . ? 
C6 C7 C10 C11 -125.6(4) . . . . ? 
C8 C7 C10 C11 119.7(4) . . . . ? 
O2 C10 C11 C12 -180.0(5) . . . . ? 
C7 C10 C11 C12 0.4(4) . . . . ? 
C13 O4 C12 O3 179.5(3) . . . . ? 
C13 O4 C12 C11 0.3(6) . . . . ? 
C7 O3 C12 O4 -178.6(3) . . . . ? 
C7 O3 C12 C11 0.8(4) . . . . ? 
C10 C11 C12 O4 178.5(4) . . . . ? 
C10 C11 C12 O3 -0.7(5) . . . . ? 
C12 O4 C13 C14 -179.4(3) . . . . ? 
  
_diffrn_measured_fraction_theta_max    0.992 
_diffrn_reflns_theta_full              25.02 
_diffrn_measured_fraction_theta_full   0.992 
_refine_diff_density_max    0.340 
_refine_diff_density_min   -0.280 
_refine_diff_density_rms    0.068 
